# Supplementary material for: Coronary Microvascular Dysfunction in Takotsubo Syndrome Assessed by Angiography-Derived Index of Microcirculatory Resistance: A Pressure-Wire-Free Tool
Source: MDPI journal article supplement (doi:10.3390/jcm10194331), 2021-09-23
Supplement: s1 [file s1]

**Table S1. NH-IMRangio by each artery in different patterns of wall motion abnormalities**

| <b>LEFT ANTERIOR DESCENDING (n: 166 patients)</b> |           |                     |                  |
|---------------------------------------------------|-----------|---------------------|------------------|
| <b>Pattern of wall motion abnormality:</b>        | <b>n:</b> | <b>NH-IMRangio</b>  | <b>p: 0.0152</b> |
| - Apical limited                                  | 83        | 41.38 (28.71-51.18) |                  |
| - Midventricular & apical                         | 42        | 56.98 (40.58-70.73) |                  |
| - Midventricular limited                          | 18        | 35.34 (26.21-59.93) |                  |
| - Basal limited                                   | 10        | 41.19 (26.83-49.79) |                  |
| - Midventricular & basal                          | 5         | 73.11 (69.34-76.91) |                  |
| - Others                                          | 8         | 50.20 (41.19-55.48) |                  |
| <b>CIRCUMFLEX LEFT ARTERY (n: 156 patients)</b>   |           |                     |                  |
| <b>Pattern of wall motion abnormality:</b>        | <b>n:</b> | <b>NH-IMRangio</b>  | <b>p: 0.1869</b> |
| - Apical limited                                  | 78        | 29.47 (21.29-47.54) |                  |
| - Midventricular & apical                         | 41        | 41.24 (23.75-53.08) |                  |
| - Midventricular limited                          | 17        | 30.71 (25.17-35.47) |                  |
| - Basal limited                                   | 8         | 26.70 (18.90-40.50) |                  |
| - Midventricular & basal                          | 5         | 63.55 (55.31-71.30) |                  |
| - Others                                          | 7         | 40.18 (24.80-58.46) |                  |
| <b>RIGHT CORONARY ARTERY (n: 141 patients)</b>    |           |                     |                  |
| <b>Pattern of wall motion abnormality:</b>        | <b>n:</b> | <b>NH-IMRangio</b>  | <b>p: 0.0189</b> |
| - Apical limited                                  | 66        | 33.41 (19.96-44.64) |                  |
| - Midventricular & apical                         | 37        | 44.61 (31.58-59.31) |                  |
| - Midventricular limited                          | 17        | 38.00 (26.57-52.34) |                  |
| - Basal limited                                   | 10        | 27.96 (22.83-41.44) |                  |
| - Midventricular & basal                          | 5         | 67.83 (62.90-73.13) |                  |
| - Others                                          | 6         | 33.36 (30.02-43.72) |                  |

Variables are expressed as median (IQR), NH-IMRangio: non-hyperemic angiography-derived index of microcirculatory.

**Table S2 – Differences in patients based on the number of arteries with CMD (n: 166 patients)**

|                                   | One artery affected (n: 17) | Two arteries affected (n: 67) | Three arteries affected (n: 82) | p      |
|-----------------------------------|-----------------------------|-------------------------------|---------------------------------|--------|
| Age (years)                       | 81.3 (70.1-82.7)            | 72.3 (65.0-80.9)              | 75.6 (64.3-83.0)                | 0.1348 |
| Female gender                     | 23.5                        | 19.4                          | 86.6                            | 0.462  |
| Prior physical stressful trigger  | 52.9                        | 35.8                          | 36.6                            | 0.450  |
| Prior emotional stressful trigger | 5.9                         | 20.9                          | 20.7                            | 0.473  |
| Dyskinesias location:             |                             |                               |                                 | 0.133  |
| - Apical limited                  | 64.7                        | 50.2                          | 42.7                            | 0.063  |
| - Mid-ventricular + Apical        | 11.8                        | 22.9                          | 35.4                            | 0.020  |
| - Mid-ventricular limited         | 17.7                        | 10.5                          | 12.2                            | 0.717  |
| - Basal limited                   | 5.9                         | 7.5                           | 4.9                             | 0.804  |
| - Mid-ventricular + Basal         | 0                           | 0                             | 2.4                             | 0.355  |
| - Other                           | 0                           | 9.0                           | 2.4                             | 0.112  |
| SBP (mmHg)                        | 135.5 (117-143.5)           | 130 (115-150)                 | 128 (115-143)                   | 0.8343 |
| Killip class at admission:        |                             |                               |                                 | 0.195  |
| - I                               | 41.2                        | 67.2                          | 68.3                            | 0.092  |
| - II                              | 29.4                        | 10.5                          | 17.1                            | 0.140  |
| - III                             | 11.8                        | 10.5                          | 9.8                             | 0.967  |
| - IV                              | 17.7                        | 11.9                          | 4.9                             | 0.139  |
| Heart rate (bpm)                  | 90.5 (80-115)               | 86.5 (75-100)                 | 81 (73-93)                      | 0.0844 |

|                                  |                  |                  |                  |        |
|----------------------------------|------------------|------------------|------------------|--------|
| Atrial fibrillation              | 5.9              | 26.0             | 7.3              | 0.939  |
| End-diastolic LV pressure (mmHg) | 17 (14-19)       | 18 (12-25)       | 18 (12.5-24.5)   | 0.8588 |
| LVEF (%)                         | 51 (41-62)       | 44 (35-58)       | 44 (38-52)       | 0.1635 |
| pH                               | 7.31 (7.25-7.36) | 7.33 (7.26-7.4)  | 7.42 (7.34-7.44) | 0.3207 |
| Lactate (mmol/L)                 | 5.2 (3-7.3)      | 2.5 (1.1-3.5)    | 2.3 (0.8-3.1)    | 0.3675 |
| Hemoglobin (g/L)                 | 125.5 (109-132)  | 130 (115-143)    | 130 (117-140)    | 0.2596 |
| NT-proBNP (pg/mL)                | 2094 (200-4550)  | 2696 (1588-4166) | 3650 (1924-7400) | 0.0031 |
| hs-cTnT (ng/L)                   | 346 (61-558.5)   | 222 (94-735)     | 260 (64-643)     | 0.8283 |

---

Continuous variables are expressed as median (IQR) and categorical data as %. SBP: systolic blood pressure; LVEF: left ventricle ejection fraction; hs-cTnT: high-sensitive cardiac Troponin T
